1 **Title:** The effect of chronic and acute stressors, and their interaction, on gonadal function: an  
2 experimental test during gonadal recrudescence.

3  
4 **Running title:** The effect of chronic and acute stressors on gonads.

5  
6  
7 **Authors:**

8 Mikus Abolins-Abols<sup>a</sup> (corresponding author), Rachel E. Hanauer<sup>a</sup>, Kimberly A. Rosvall<sup>a</sup>, Mark  
9 P. Peterson<sup>b</sup>, Ellen D. Ketterson<sup>a</sup>.

10

11 **Addresses:**

12 <sup>a</sup> 1001 E. 3rd St., Department of Biology, Indiana University, Bloomington, IN 47405, USA

13 <sup>b</sup> 1800 Technology Dr. NE, Life-Science Innovations, Willmar, Minnesota 56201, USA

14

15 **Corresponding author email:** mabolins@indiana.edu

16 **Key words:** stress, reproduction, gonad, testosterone, transcriptome, songbird

17

18 **Summary statement**

19 An acute stressor downregulated testosterone production, but this effect was absent in  
20 chronically disturbed birds. The acute stressor had a strong effect on the gonadal transcriptome,  
21 whereas chronic disturbance had a negligible effect.

22 **Abstract**

23 Organisms are expected to invest less in reproduction in response to a stressor, but theory  
24 predicts that this effect should depend on the frequency of stressors in the environment. Here  
25 we investigated how an acute stressor affected gonadal function in a songbird, and how long-  
26 term differences in the stress environment influenced these acute stress responses. We  
27 exposed male Dark-eyed Juncos (*Junco hyemalis*) either to chronic or minimal (control)  
28 disturbance during gonadal recrudescence, after which we measured baseline testosterone,  
29 testosterone after an acute handling stressor, and the ability to elevate testosterone in response  
30 to hormonal stimulation. In a 2x2 design, we then euthanized males from the two chronic  
31 treatment groups either immediately or after an acute stressor to investigate the effect of these  
32 treatments on the gonadal transcriptome. We found that chronically disturbed birds had  
33 marginally lower testosterone. The acute stressor suppressed testosterone in control birds, but  
34 not in the chronic disturbance group. The ability to elevate testosterone did not differ between  
35 the chronic treatments. Surprisingly, chronic disturbance had a weak effect on the testicular  
36 transcriptome, and did not affect transcriptomic response to the acute stressor. The acute  
37 stressor, on the other hand, upregulated cellular stress response, and affected expression of  
38 genes associated with hormonal stress-response. Overall, we show that both chronic and acute  
39 stressors affect reproductive function, and that chronic stress changes how acute stressors  
40 affect testosterone physiology. Our findings also suggest that acute and chronic stressors affect  
41 testes differently, and that gonadal function is relatively robust to long-term stressors.

## 42 **1. Introduction**

43 It is well-known that stressors can have a profound negative effect on reproductive physiology  
44 and behavior (Chand and Lovejoy, 2011; Rivier and Rivest, 1991; Selye, 1946). This effect has  
45 been demonstrated in relation to a variety of stressors, including food limitation (Lynn et al.,  
46 2015), thermal stress (Hansen, 2009), and psychological stress (McGrady, 1984; Nargund,  
47 2015). The main adaptive hypothesis for this suppressive effect states that reproduction is  
48 inhibited because the physiological, energetic, and behavioral components of reproduction are  
49 costly and may directly interfere with resource and time allocation to stress response (Breuner  
50 et al., 2008). Because the stress response is an integral part of self-maintenance and survival,  
51 the interaction between stress and reproduction constitutes an important aspect of the life-  
52 history trade-off between current and future reproduction (Wingfield and Sapolsky, 2003).

53 Life history theory predicts that the effect of stress on reproduction should depend on the  
54 costs and benefits of both of these functions (Wingfield and Sapolsky, 2003). For example, if  
55 future reproductive success (residual reproductive value) is expected to be low, succeeding at  
56 the current reproductive effort is crucial to the fitness of the organism. It is expected that under  
57 these conditions reproduction should be more resistant to the suppressive effects of stressors  
58 compared to cases when future reproductive success is expected to be high. Consistent with  
59 this prediction, stress has been shown to be less suppressive of reproduction in semelparous  
60 organisms and organisms that have short seasonal breeding seasons (Wingfield and Sapolsky,  
61 2003). At an intraspecific level, stressors have been shown to have a reduced effect on  
62 reproductive behaviors in populations that inhabit high-disturbance urban areas compared to  
63 rural habitats (Abolins-Abols et al., 2016).

64 While these findings are consistent with the theoretical predictions, we lack experimental  
65 studies that explicitly test these predictions and study which conditions lead to changes in the  
66 suppressive effect of stress on reproduction. Revealing the conditions and mechanisms that  
67 mediate effects of stress on reproduction is important for a better understanding of reproductive  
68 physiology and ecology of animals (Calisi et al. 2017), especially in the context of the rapid  
69 human-induced environmental change (Sih et al. 2011). Ultimately, such knowledge will aid in  
70 developing a predictive understanding of how and why individuals or populations respond  
71 differently to stressors.

72 We are addressing this question by focusing on the gonad, as one of the most important  
73 reproductive organs. In vertebrate males, testes produce sperm and androgen hormones, such  
74 as testosterone. Testosterone serves multiple important roles in reproduction: it regulates the  
75 development of the sexual phenotype (Hau, 2007), and is important in mediating behaviors

76 necessary for reproduction, such as courtship (Fusani et al., 2014; Hutchinson, 1967) and  
77 territorial behavior (Soma, 2006; Wingfield et al., 1987). Testosterone synthesis is largely  
78 regulated by the hypothalamic-pituitary-gonadal (HPG) axis, where gonadotropin releasing  
79 hormone (GnRH) from hypothalamus causes the secretion of luteinizing hormone (LH) from the  
80 pituitary, which in turn upregulates synthesis of testosterone by the Leydig cells in gonads  
81 (Farner and Wingfield, 1980; London et al., 2006). However, testosterone synthesis by gonads  
82 has also been shown to change in response to local signaling factors independent of brain  
83 signaling (Nogueiras et al., 2004; Tena-Sempere et al., 2002). Testosterone levels can be  
84 suppressed by both psychological (Deviche et al., 2010; Moore and Mason, 2000) as well as  
85 physical stressors (Lynn et al., 2015; Nelson et al., 1989). This decrease may be mediated via  
86 suppressive effects of stressors on GnRH or LH secretion (Breen and Karsch, 2006; Breen et  
87 al., 2007; Nikolarakis et al., 1986) or by direct action of components of the physiological stress  
88 response, such as the hypothalamic-pituitary-adrenal (HPA) axis, on gonads (Lynn et al., 2015;  
89 McGuire et al., 2013).

90 Gonads have been shown to be especially sensitive to stressors and other perturbations  
91 during development (Guillette Jr et al., 1994; Rhind et al., 2001; Zambrano et al., 2014). For  
92 example, maternal stress during fetal gonadal development can result in reduced gonadal size  
93 (Dahlöf et al., 1978), and exposure to glucocorticoids during fetal development has been shown  
94 to reduce testosterone synthesis capacity *in vitro* (Page et al., 2001) and delay the onset of  
95 puberty (Smith and Waddell, 2000). Such developmental programming has important  
96 implications for pathology and reproductive rates in the wild (McMillen and Robinson, 2005;  
97 Sheriff et al., 2010). If gonadal responses to developmental stress are adaptive, then the effect  
98 of stressors on gonadal function should conform to the life history expectations, as outlined  
99 above, wherein gonads are expected to be less sensitive to stressors in animals undergoing  
100 development in a high-stress environment compared to animals developing in a benign  
101 environment.

102 In this study we experimentally investigated how acute and chronic stressors  
103 experienced during seasonal gonadal recrudescence (development) change gonadal function in  
104 Dark-eyed Junco (*Junco hyemalis*), a small passerine. In particular, we asked if chronic  
105 disturbance and acute stressors, and their interaction, changed baseline testosterone levels, the  
106 overall ability to elevate testosterone following stimulation with exogenous GnRH, testicular  
107 sensitivity to regulation by HPG and HPA axes, and testicular transcriptome in general. In  
108 general, we expected both types of stressors to reduce reproductive function in animals with  
109 actively recrudescing gonads, but that animals in high disturbance environment would show a

110 reduced sensitivity of reproductive physiology to acute stressors, compared to animals in a low  
111 disturbance (control) environment. Specifically, we predicted that both chronic and acute  
112 stressors should decrease testosterone levels, but that the suppressive effect of an acute  
113 stressor on testosterone synthesis would be dampened in chronically disturbed animals. We  
114 further predicted that both chronic and acute stressors would negatively affect genes associated  
115 with testosterone production and spermatogenesis, up-regulate expression of genes involved in  
116 cellular and hormonal stress response, but that the effect of acute stressor on the gonadal  
117 transcriptome would be dampened in the chronically disturbed animals. More specifically, we  
118 expected that stressors would down-regulate steroidogenesis gene expression and up-regulate  
119 receptors for stress hormones implicated in regulation of gonadal physiology, such as  
120 glucocorticoid-receptor (GR)(McGuire et al., 2013) and gonadotropin-inhibitory hormone  
121 receptor (GnIHR)(McGuire and Bentley, 2010).

122

## 123 **METHODS**

### 124 **2.1 Capture and housing of study organisms**

125 We captured 36 wintering male Dark-eyed Juncos *Junco hyemalis hyemalis* in Bloomington,  
126 Indiana, in December 2013 using baited mistnets and walk-in traps. We determined the sex of  
127 birds using plumage color and confirmed it with genetic sex markers (Griffiths et al., 1998).  
128 Before the experiment, birds were housed in free-flying groups in indoor aviary rooms, reflecting  
129 their natural winter flocking lifestyle. On January 15, 2014 we started to gradually (3 times per  
130 week) increase day length from natural Indiana winter photoperiod (10:44 daylight hrs, **Figure**  
131 **1**). On January 27 males were transferred from free flying flocks to individual 2x2 ft metal cages,  
132 9 cages per room, with visual access to other birds, including females. Cages contained food,  
133 water bowls, and perches. Food was provided *ad libitum* three times a week, and cages were  
134 cleaned once a week. When the experiment began on February 3, animals were experiencing  
135 13:23 hrs of daylight, and by the end of the experiment on February 26, birds were exposed to  
136 16:03 hrs of daylight, reflecting a summer-like photoperiod. Males were singing during the last  
137 week of the experiment.

138

### 139 **2.2. Chronic disturbance treatment**

140 We randomly assigned half of the birds (n=18) to a chronic disturbance treatment, while the  
141 other half (n=18) were treated as controls. In the chronic disturbance treatment, birds were  
142 exposed to either physical disturbance (hand-waving, cage-tapping) or to a predator mount for  
143 30 min four times each day for three weeks. During physical disturbances, observers (one per

144 room) either waved their hand inside the cage, or tapped on the cage for 30 sec, after which the  
145 observer moved on to another cage in random order. For the predator stressor, we used  
146 taxidermic study skins of Cooper's Hawk, Barn Owl, and Fox Squirrel, which were fixed to a  
147 tripod and left in the room by the observer. All these treatments had previously been validated in  
148 a pilot study and shown to result in an increase in corticosterone, a measure of a physiological  
149 stress response (Hanauer et al. in prep). In the pilot study, physical disturbance caused the  
150 highest increase in corticosterone, therefore birds in the chronic disturbance treatment received  
151 at least one of these disturbances each day (average: 2.5 physical disturbances each day).  
152 Otherwise, the choice of the stressors for each disturbance bout was random. The disturbance  
153 bouts occurred at least 60 min apart for each room and were administered during daylight  
154 hours. In the control group, we did not disturb the birds except for standard animal husbandry  
155 (see above).

156

### 157 **2.3. Blood sampling and acute handling stressor**

158 We took blood samples from each bird to analyze testosterone and corticosterone  
159 concentrations before (February 1-2) and after the three weeks (February 23-24) of chronic  
160 disturbance or control treatment. In addition, blood was taken from birds one week after the  
161 beginning of treatment for analysis of corticosterone levels (February 8-9). Results describing  
162 corticosterone levels in response to treatments are reported in Hanauer et al. (in prep.). Each  
163 bird was captured between 7 am and 12 pm, and a baseline blood sample (100 ul) was taken  
164 from the brachial vein within 4 min of capture using a 26-gauge needle and microcapillary tubes.  
165 After the sample was taken, each bird was kept in a brown paper bag for 30 min, a standard  
166 acute handling stressor that is widely used to assess physiological stress response (Sheriff et  
167 al., 2011). After 30 min in the paper bag, each bird was bled again (100 ul) to measure acute  
168 stressor-induced hormone levels. Blood was stored at 4°C until centrifugation. Later the same  
169 day, we centrifuged the microcapillary tubes to separate plasma and measure hematocrit,  
170 following which plasma was removed using Hamilton syringe and stored in -20°C until analysis.

171

### 172 **2.4. GnRH injection following an acute stressor**

173 To assess the ability of gonads to increase T, during the last sampling round at the end of the  
174 experiment (February 23-24) we injected birds with 50 ml of 25 ng/ul gonadotropin releasing  
175 hormone (GnRH, in 1M PBS, American Peptide Company Inc., Sunnyvale, CA, product no. 54-  
176 8-23) 35 min after capture (i.e. after the stress-induced 30 min blood sample was collected).  
177 GnRH is the top regulator of testosterone synthesis that is naturally produced in hypothalamus

178 (Ciechanowska et al., 2010). GnRH-induced testosterone levels have been shown to be  
179 repeatable (Jawor et al., 2006) and are linked to a higher probability of survival (McGlothlin et  
180 al., 2010) and morphological characteristics (Atwell et al., 2014). To administer GnRH, we  
181 cleaned the pectoral muscle using an alcohol swab, and injected 50 ul of GnRH using a  
182 Hamilton syringe. GnRH solutions were kept on ice before the injection to prevent degradation  
183 of the peptide. We then collected blood (100 ul) 30 min after injection to measure the capacity of  
184 gonads to secrete testosterone following an acute stressor.

185

## 186 **2.5. Morphological measurements**

187 After blood collection we used a ruler to measure the size of the cloacal protuberance by  
188 measuring its length from body to the cloacal opening to the nearest 0.5 mm. We also  
189 measured the pectoral muscle condition, fat score, and mass. The effects of the treatment on  
190 condition, fat, and mass are reported elsewhere (Hanauer et al. in prep).

191

## 192 **2.6. Hormone assays**

193 We measured testosterone levels in the blood plasma using commercial enzyme immune assay  
194 (EIA) from Enzo Life Sciences (Farmingdale, NY, product no. ADI-901-65) that has been  
195 previously validated for use in this species (Clotfelter et al., 2004). Testosterone was extracted  
196 from 20 ul of plasma using diethyl ether. Tritiated testosterone was added to the sample to  
197 estimate extraction efficiency (average 94.8%). Extracted hormone was reconstituted in 50 ul of  
198 98% ethanol, followed by 300 ul of assay buffer. We followed manufacturer's instructions for the  
199 remaining procedures. We estimated hormone concentrations in reference to a 9-point standard  
200 curve using a curve-fitting program (Microplate Manager, Bio-Rad Laboratories, Hercules, CA).  
201 Samples were distributed randomly across and within plates, and all samples and standard  
202 curves were run in duplicate. Within-plate variation was 7.01% and between-plate variation was  
203 1.89%. We did not correct for either extraction efficiency or across-plate variation.

204

## 205 **2.7 Tissue collection**

206 One to two days after the final blood sampling (Feb 25-26), birds were euthanized using  
207 isoflurane overdose in a two-way factorial design: birds from both chronic disturbance and  
208 control treatments were euthanized either immediately after capture or after 90 min of being  
209 held in a paper bag (acute handling stressor). Literature on immediate early gene (IEG)  
210 expression and half-life suggests that 90 min following stimulus allows to capture both induction  
211 as well as reduction in IEG expression (Maney and Goodson, 2011). Since IEGs include



212 transcription factors, we estimated that gene expression 90 min after capture was likely to  
213 capture both up-regulation and down-regulation of components of the gonadal transcriptome  
214 compared to expression immediately following capture. Gonads were dissected and flash-frozen  
215 on pulverized dry ice. To assess gonadal size, we measured gonadal mass (to the nearest mg)  
216 before RNA extraction.

217

## 218 **2.8. Microarray hybridization and analyses**

219 RNA was extracted from gonads using Trizol method (Invitrogen, Carlsbad, CA) and quantified  
220 using the Nanodrop ND-2000 (ThermoScientific, Waltham, MA). Sample integrity was verified  
221 using Agilent Bioanalyzer or TapeStation (Agilent Technologies, Santa Clara, CA). Total RNA  
222 was converted to double stranded cDNA using the TransPlex Complete Whole Transcriptome  
223 Amplification Kit (Sigma-Aldrich, St. Louis, MO, product no. WTA2) according to manufacturers  
224 instructions. We used a custom Nimblegen 12-plex microarray (Roche Nimblegen, Madison, WI)  
225 for the Dark-eyed junco (Peterson et al., 2014) to analyze the effect of treatments on  
226 transcriptome (see Supplementary Material for more detailed molecular methods). The  
227 microarray contained 33,545 assembled sequencing reads (contigs) in triplicate covering 22,765  
228 putative genes (isogroups), which were based on Dark-eyed Junco transcriptome sequencing  
229 (Peterson et al., 2012). cDNA was hybridized to the microarray using a full round-robin design.

230 A series of pair-wise comparisons were tested to identify significant differences in gene  
231 expression using R package limma (Smyth, 2005) (i.e. we compared chronic disturbance vs.  
232 control within each acute handling treatment and pooled; and acute handling vs. unhandled  
233 control within each chronic treatment and pooled). We calculated a global false-discovery rate  
234 across all comparisons and used a q-value threshold of 0.05 for significance (see Peterson et  
235 al. (2014) for further details). We used topGO (Alexa and Rahnenfuhrer, 2010) with the weight  
236 algorithm (Alexa et al., 2006) to identify the gene ontology (GO) terms (Ashburner et al., 2000)  
237 that were significantly over-represented among the significantly differentially expressed genes in  
238 each comparison.

239

## 240 **2.9. qPCR**

241 The microarray did not include all of our candidate genes of interest. Therefore, we  
242 subsequently performed quantitative polymerase chain reaction (qPCR) to test our a priori  
243 predictions about genes related to testosterone synthesis and gonadal function. Specifically, we  
244 quantified expression of steroid synthesis genes (luteinizing hormone receptor (LHR),  
245 steroidogenic acute regulatory protein (StAR), cytochrome P450 side-chain cleavage (P450),

246 cytochrome P450 17 $\alpha$ -hydroxylase (CYP17), 3 $\beta$ -hydroxysteroid dehydrogenase/isomerase  
247 (3 $\beta$ HSD), and 17 $\beta$ -hydroxysteroid dehydrogenase (17 $\beta$ HSD)), as well as genes that encode  
248 receptors for hormones that may regulate gonadal function (sperm production: follicle-  
249 stimulating hormone receptor (FSHR); response to stressors: glucocorticoid receptor (GR),  
250 mineralocorticoid receptor (MR), gonadotropin inhibitory hormone receptor (GnIHR)). Most of  
251 the primers, except 17 $\beta$ HSD and FSHR primers, had been previously validated in our system  
252 (Bergeon Burns et al., 2014; Rosvall et al., 2016a; Rosvall et al., 2016b). 17 $\beta$ HSD and FSHR  
253 primers were designed using Zebra finch and White-throated sparrow genomes, respectively,  
254 using Primer-BLAST (Ye et al., 2012). Primer sequences and efficiencies are reported in the  
255 Supplementary Material (**Table S1**). We ran qPCR reactions using PerfeCTa SYBR Green  
256 SuperMix (Quantabio, Beverly, MA, product no. 95054) on the Roche LightCycler 480 platform  
257 (Roche Holding AG, Basel, Switzerland) using the same cDNA samples from the microarray.  
258 The cDNA concentration was similar between samples (17 to 22 ng/ $\mu$ l). We analyzed samples  
259 in triplicate, calculated the relative gene expression in each sample in reference to a pooled  
260 standard, and normalized this value against average expression of two housekeeping genes  
261 (Peptidylprolyl Isomerase A (PPIA) and Ribosomal Protein L4 (RPL4)) using LightCycler 480  
262 software (Roche Holding AG, release no. 1.5.1.62). PPIA and RPL4 are two of the most stable  
263 housekeeping genes in testes of passerines (Zinzow-Kramer et al., 2014), and their expression  
264 did not differ between chronic or acute treatments. Primers for PPIA and RPL4 were designed  
265 using White-throated sparrow genome. Additional details for qPCR can be found in the  
266 Supplementary Material.

267

## 268 **2.10. Statistical analysis**

269 We analyzed our data in R (R Core Team, 2013). When running parametric tests, we confirmed  
270 that residuals satisfied the expectation of normality. If model residuals were not normal, we  
271 transformed the data. We used linear (LM) and linear mixed effects models (LMM, package  
272 nlme, Pinheiro et al. 2015) with marginal sums of squares to analyze the effect of chronic and  
273 acute treatments on reproductive physiology (hormone levels) and morphology (testes mass  
274 and CP size). We included time of sampling as a covariate in all models investigating hormone  
275 levels. When testing for change in hormone levels between sampling rounds (beginning vs end  
276 of the experiment) or the effect of acute (baseline vs acute stressor-induced), chronic  
277 (disturbance vs control) treatment, and their interaction on hormone levels, we included  
278 individual ID as random factor to account for repeated measures. If the interactions were not  
279 significant, we report the main effects from models without the interaction term. Our sample size

280 differed between sampling rounds and between bleeds because of low blood volume in some of  
281 the samples.

282 We used two different multivariate approaches to analyze the effect of treatments on  
283 candidate gene expression (determined by qPCR). Since the expression of steroidogenic genes  
284 showed significant pairwise correlations, we used principal components analysis to summarize  
285 the covariation in gene expression by creating independent principal components. We then  
286 used the first principal component as a dependent variable in ANOVA to ask if chronic or acute  
287 treatments, or their interaction affected steroidogenic gene expression. Following this, we used  
288 ANOVAs to analyze each gene separately and corrected for multiple comparisons using the  
289 Benjamini-Hochberg (BH) method.

290 Because the expression of receptors that may downregulate gonadal function (GR, MR,  
291 and GnIHR) was not correlated to each other and they mediate different functions in animals,  
292 we used MANOVA to analyze the effect of chronic and acute treatments on the overall  
293 sensitivity to stress-signaling. Following MANOVA, we analyzed each gene independently using  
294 ANOVA and corrected for multiple comparisons using the Benjamini-Hochberg (BH) method.  
295 FSHR expression was analyzed independently using a linear model, because its function is not  
296 known to relate to stress-signaling or steroidogenesis.

297

### 298 3. RESULTS

#### 299 3.1. Testosterone

300 **Pre-treatment:** At the outset of the experiment neither baseline testosterone (LM, n=20,  
301  $F_{2,17}=0.086$ ,  $p=0.773$ ) nor testosterone after acute handling stressor (LM, n=14,  $F_{2,11}=1.207$ ,  
302  $p=0.295$ ) differed between the chronic and control treatment groups, and acute handling  
303 stressor did not reduce testosterone compared to baseline levels (LMM, n=33,  $F_{1,10}=0.226$ ,  
304  $p=0.645$ , **Figure 2A**). Baseline testosterone increased throughout the experiment in both  
305 treatments (LMM, n=46,  $F_{1,12}=15.716$ ,  $p=0.002$ ), consistent with recrudescence of gonads in  
306 response to increasing day length.

307 **Post-treatment:** After three weeks of treatment, birds from the chronic disturbance group had  
308 marginally lower baseline testosterone levels than controls (LM, n=27,  $F_{2,24}=3.643$ ,  $p=0.068$ ).  
309 Testosterone levels after 30 min of acute handling stressor did not differ between treatments  
310 (LM, n=21,  $F_{2,18}=0.584$ ,  $p=0.455$ ). There was a significant interaction between the two long-  
311 term treatments (chronic and control) and acute treatments (handled vs unhandled) on  
312 testosterone levels (LMM, n=48,  $F_{1,17}=5.935$ ,  $p=0.026$ , **Figure 2B**). Post-hoc ANOVAS showed  
313 that birds from the control treatment showed a significant reduction in their testosterone levels

314 from baseline to post-acute handling stress (LMM,  $n=24$ ,  $F_{1,8}=5.842$ ,  $p=0.042$ ), while birds from  
315 the chronic disturbance treatment did not (LMM,  $n=24$ ,  $F_{1,9}=0.793$ ,  $p=0.396$ ). Control and  
316 chronically disturbed birds significantly increased their testosterone in response to GnRH-  
317 injection compared to pre-injection levels (LMM,  $n=50$ ,  $F_{1,19}=63.527$ ,  $p<0.001$ ), but the GnRH-  
318 induced testosterone did not differ between treatment groups (LMM,  $n=50$ ,  $F_{1,18}=0.274$ ,  
319  $p=0.607$ , **Figure 2C**).

320

### 321 **3.2. Reproductive organs and relationship with physiology**

322 Testes mass was not affected by the chronic disturbance treatment (LM,  $n=35$ ,  $F_{1,33}=0.873$ ,  
323  $p=0.357$ , **Figure 3A**). Testes mass was positively related to testosterone levels after acute  
324 handling stress (LM,  $n=21$ ,  $F_{2,18}=6.620$ ,  $p=0.019$ ) as well as GnRH-induced testosterone levels  
325 (LM,  $n=29$ ,  $F_{2,26}=8.292$ ,  $p=0.008$ ), but was not related to baseline testosterone (LM,  $n=27$ ,  
326  $F_{2,24}=0.435$ ,  $p=0.516$ ). The relationship between testes mass and testosterone was not  
327 dependent on the chronic treatment (interaction between gonad mass and treatment on post-  
328 handling T: LM,  $n=21$ ,  $F_{4,16}=0.025$ ,  $p=0.877$ ; on GnRH-induced T: LM,  $n=29$ ,  $F_{4,24}=1.201$ ,  
329  $p=0.284$ ). Cloacal protuberance (CP) size showed significant differences between treatments,  
330 with chronically disturbed birds having larger CPs than control birds (LM,  $n=33$ ,  $F_{1,31}=22.198$ ,  
331  $p<0.001$ , **Figure 3B**).

332

### 333 **3.3. Gonadal transcriptome**

334 We found that the expression of 16 transcripts were significantly affected by the chronic  
335 disturbance treatment after correcting for false discovery rate (out of 20390 total expressed in  
336 gonads in this study, 0.078%; **Table S2**). GO analysis identified 3 terms that were  
337 overrepresented among the significantly differentially expressed genes. These included:  
338 electron transport chain, extracellular structure organization (biological process), and  
339 glycosaminoglycan binding (molecular function) (**Table 1**). None of the genes that were  
340 differentially expressed between tissues in response to chronic treatment are known to link  
341 clearly to the stress response or reproductive function.

342 Acute handling stressor caused significant change in the expression of 168 transcripts  
343 compared to unhandled controls (out of 20390 total expressed in gonads, 0.823%; **Table S3**).  
344 Among genes that were contributing to these terms were a variety of heat shock proteins  
345 (HSPB1, DNAJA4, HSPA4L, HSP90AA1), and genes associated with inflammation and cytokine  
346 signaling (IL4R, PIK3AP1, MAP3K8). GO analysis identified a number of terms that were  
347 overrepresented in the set of genes that showed significant treatment effect including: receptor

348 signaling protein activity, intracellular steroid hormone receptor signaling pathway, cellular  
349 protein complex assembly, response to stimulus, and 'de novo' posttranslational protein folding  
350 (**Table 2**). One unannotated transcript with an unknown function showed a significant interaction  
351 between the long-term treatments (chronic vs control) and acute treatments (handled vs  
352 unhandled).

353

### 354 **3.4. Testosterone synthesis and HPG axis receptors**

355 Principal components analysis of six genes involved in testosterone synthesis (LH-R, STAR,  
356 p450scc, CYP-17, 3bHSD, 17bHSD) showed that PC1 loaded negatively for all genes and  
357 explained 45% of the variation in expression (**Table S4**). This suggests that the expression of  
358 the testosterone synthesis genes co-varied in the same direction between individuals. However,  
359 variation in PC1 was not explained by long-term disturbance (LM,  $n=35$ ,  $F_{3,31}=0.261$ ,  $p=0.613$ ),  
360 acute handling stressor (LM,  $n=35$ ,  $F_{3,31}= 1.700$ ,  $p=0.202$ ), or the interaction of these treatments  
361 (LM,  $n=35$ ,  $F_{3,31}=0.231$ ,  $p=0.634$ ). Since testosterone levels decreased significantly in response  
362 to acute handling stressor only in the control treatment, we conducted a separate PCA of only  
363 the control individuals (see **Table S5** for loadings). This analysis showed that acute handling  
364 stressor tended to reduce the expression of testosterone synthesis genes 90 min later, although  
365 this effect was not significant (LM,  $n=17$ ,  $F_{1,15}=3.157$ ,  $p=0.096$ ). Analysis of each of the genes  
366 individually using ANOVA, showed that CYP17 levels were marginally lower in handled control  
367 birds (LM,  $n=17$ ,  $F_{1,15}=4.418$ ,  $p=0.053$ , see **Table S6** for other genes) although this effect was  
368 not significant after multiple comparison correction ( $p=0.317$ , **Figure S1**).

369 Neither handling (LM,  $n=35$ ,  $F_{2,32}= 2.051$ ,  $p=0.162$ ), nor chronic disturbance (LM,  $n=35$ ,  
370  $F_{2,32}= 2.733$ ,  $p= 0.108$ ), nor their interaction (LM,  $n=35$ ,  $F_{3,31}= 0.437$ ,  $p= 0.514$ ) affected  
371 expression of FSH-R (**Figure S2**).

372

### 373 **3.5. Gonadal sensitivity to regulation by HPA**

374 MANOVA showed that acute handling stressor ( $n=35$ , Wilks=0.676,  $F_{3,30}=4.791$ ,  $p=0.008$ ), but  
375 not chronic disturbance ( $n=35$ , Wilks=0.907,  $F_{3,30}=1.027$ ,  $p=0.395$ ), nor interaction between  
376 chronic treatment and acute handling stressor ( $n=35$ , Wilks= 0.855,  $F_{3,29}=1.643$ ,  $p=0.201$ )  
377 affected expression of receptors for hormones that are known to suppress or inhibit testosterone  
378 production. Post-hoc linear models comparing handled to unhandled birds showed that acute  
379 handling stressor significantly down-regulated GR mRNA expression (LM,  $n=35$ ,  $F_{2,32}=5.207$ ,  
380  $p=0.029$ , **Figure 4A**) and marginally up-regulated of GnIHR expression (LM,  $n=35$ ,  $F_{2,32}=3.517$ ,

381  $p=0.070$ , **Figure 4C**), although these effects were not significant after correction for multiple  
382 comparisons (see **Table S7**).

383

#### 384 **4. DISCUSSION**

385 In this study we experimentally tested how chronic disturbance, acute handling stressor, and  
386 their interaction affected gonadal function in a songbird during seasonal gonadal  
387 recrudescence. We showed that birds in the chronic disturbance treatment had marginally lower  
388 baseline testosterone compared to control animals. Acute handling stressor reduced  
389 testosterone levels in control animals, but not in animals from the chronic disturbance treatment.  
390 The chronic disturbance treatment did not affect the ability to produce testosterone in response  
391 to exogenous stimulation from GnRH, and gonad size did not differ between chronic disturbance  
392 and control treatments. Surprisingly, birds in the chronic disturbance treatment had significantly  
393 larger cloacal protuberances than birds in the control treatment. Chronic disturbance had very  
394 little effect on gonadal gene expression: neither steroidogenic enzyme expression, nor  
395 expression of receptors associated with potential regulation of gonadal function showed  
396 significant differences between the chronic disturbance and control treatments. Overall, chronic  
397 disturbance had a significant effect on only a handful of genes in the transcriptome. Acute  
398 handling stressor, on the other hand, had a comparatively strong effect on the gonadal  
399 transcriptome, a marginal suppressive effect on steroidogenesis enzyme gene expression, a  
400 suppressive effect on the expression of glucocorticoid receptor mRNA, and a marginal positive  
401 effect on GnRH-R gene expression compared to unhandled animals. There was little evidence of  
402 an interaction between chronic disturbance and acute stressor on the expression of gonadal  
403 transcriptome. Collectively, these findings shed light on mechanisms by which short and long-  
404 term stressors, and their interaction, affect reproductive function.

405

##### 406 **4.1. Chronic stressor and gonadal function**

407 Birds from the chronic disturbance treatment had marginally lower baseline testosterone levels  
408 compared to the control treatment. Our study adds to other reports in a variety of organisms that  
409 have shown a decrease in testosterone in response to chronic disturbance (Pickering et al.  
410 1987; Moore et al. 1991; Retana-Márquez et al. 2003) although some studies do not show this  
411 effect (Armario and Castellanos 1984; Jones and Bell 2004). Long-term suppression of  
412 testosterone levels in response to chronic stressor has important ecological implications.  
413 Human-induced rapid environmental change is exposing animals to novel environments and  
414 rapid changes in the disturbance regimes, which have been shown to have strong negative



415 effects on foraging and survivorship (Kerley et al., 2002; Sih et al., 2011). If a decrease in  
416 testosterone in response to chronic disturbance results in reduced investment in reproduction in  
417 general, this may exacerbate the negative effects of disturbance on fitness.

418 Mechanistically, the differences in testosterone levels between the chronic disturbance  
419 and control birds in this study were not explained by differences in gonadal physiology. Testes  
420 mass and GnRH-induced testosterone levels did not differ between treatments, indicating that  
421 the ability of the gonads to produce and elevate testosterone was not different. This suggests  
422 that the marginally lower testosterone levels in the chronically disturbed animals and their  
423 insensitivity to acute handling stress compared to control animals were not caused by long-  
424 lasting differences in the ability of the testes to produce testosterone.

425 Differences in testosterone levels instead may be mediated by local or systemic  
426 signaling that transiently suppresses or activates testosterone synthesis in the gonad or  
427 testosterone metabolism in the liver. Experimental studies have shown that GnIH (McGuire and  
428 Bentley, 2010) and corticosterone (McGuire et al., 2013) downregulate testosterone by acting  
429 directly on gonadal tissue. This effect may be mediated by either changes in the levels of these  
430 hormones or by changes in the expression of their receptors. Baseline corticosterone did not  
431 differ between chronic disturbance and control treatments (Hanauer et al. in prep.). We could  
432 not assess GnIH expression in gonads or brain, therefore we do not know if chronic stressors  
433 upregulated GnIH synthesis. Our gene expression results showed that chronic disturbance did  
434 not affect the expression of receptors for GnIH (GnIHR), corticosterone (GR, MR), or luteinizing  
435 hormone (LHR), a top regulator of testosterone synthesis. Furthermore, chronic disturbance did  
436 not have a significant effect on steroidogenic gene expression or the testicular transcriptome in  
437 general, showing that gonadal function was nearly unaffected by the chronic disturbance  
438 treatment. This suggests that local signaling at the level of the gonad is unlikely to be the cause  
439 of lower testosterone levels or the decreased sensitivity to acute handling stressor that we  
440 observed in the chronically disturbed animals. Future analysis of the post-translational effects of  
441 stressors, as well as other tissues (e.g. hypothalamus, liver) collected from these animals may  
442 elucidate the mechanisms that caused the differences in testosterone levels between  
443 treatments (Lynn et al., 2015).

444 A surprising finding in this study was that the cloacal protuberances (CPs) were  
445 significantly larger in the chronically disturbed birds compared to control animals. CPs in birds  
446 are sperm storage organs that develop in males during the breeding season (Ray Salt, 1954)  
447 and are regulated by testosterone (Witschi, 1961). Males with larger CPs store more sperm  
448 (Tuttle et al., 1996) and larger CPs are hypothesized to allow faster copulation (Birkhead et al.,

449 1993). Barring spurious results, our finding may indicate that birds in the chronic disturbance  
450 group may be investing more in sperm production compared to the control animals, perhaps to  
451 advance their reproductive readiness or enable more rapid copulation in an uncertain  
452 environment. It is important to note that neither CPs nor testes reached their full size during this  
453 study (i.e testes mass was 21% of mature reproductive size (Bergeon Burns et al., 2014)),  
454 therefore our CP findings, coupled with measurement error, may reflect functionally irrelevant  
455 differences.

456

#### 457 **4.2. Acute stressor and gonadal function**

458 Birds in the control treatment showed a significant decrease in testosterone levels in response  
459 to the acute handling stressor. Suppression of testosterone in response to acute stressors has  
460 been shown in many other studies (Deviche et al., 2010; Deviche et al., 2012; Moore et al.,  
461 1991). This effect may be due to reduction in testosterone synthesis, or an increase in  
462 testosterone metabolism by liver (Lynn et al., 2015). We found a marginally significant decrease  
463 in the expression of steroidogenic enzyme genes in birds that had experienced an acute  
464 handling stressor compared to birds that were unhandled. Because the expression of  
465 steroidogenic enzymes is positively correlated with testosterone levels (Rosvall et al., 2016b),  
466 decrease in expression of testosterone synthesis genes may be responsible for suppression of  
467 testosterone in response to handling.

468 Downregulation of steroidogenic enzyme gene expression in response to the acute  
469 handling stressor may be due to either a change in the local or systemic signaling or because of  
470 a change in sensitivity to this signaling (Ernst et al., 2015). We found a significant overall  
471 change in hormone receptor gene expression, primarily downregulation of GR expression and  
472 upregulation of GnIHR expression, in response to the acute handling stressor. This suggests  
473 that gonads in acutely stressed birds may be less sensitive to regulation by glucocorticoids,  
474 such as corticosterone, but more sensitive to another important hormone – GnIH – that has an  
475 inhibitory effect on reproductive physiology (Tsutsui et al., 2010). MR expression was not  
476 affected by acute stressor. While GR and MR are both involved in regulating the stress  
477 response (Dickens et al., 2009) they fulfill different functional roles, with the high affinity MR  
478 (Reul and Kloet, 1985) thought to be responsible regulating baseline functions when CORT  
479 levels are low, while the low-affinity GR regulates stress-response when CORT levels are high  
480 (Ulrich-Lai and Herman, 2009; Wingfield, 2012). Thus, the GR-specific reduction we observed in  
481 response to an acute handling stressor is consistent with known differences between these two  
482 types of CORT-binding receptors. We could not assess the expression of GnIH in the gonads or



483 brain, therefore we do not know if acute or chronic stressors, in addition to GnIHR, also  
484 upregulated GnIH synthesis. In another study, we validated that corticosterone levels increased  
485 following this acute handling stressor (Hanauer et al. in prep).

486 Acute handling stress caused significant changes across the testicular transcriptome  
487 compared to unhandled animals. The gene ontology (GO) analysis did not indicate that the  
488 acute handling treatment affected testes-specific functions, such as spermatogenesis or  
489 steroidogenesis, although we note that several candidate genes were not present on this array.  
490 Instead, GO analysis suggested that acute handling stress induced cellular stress response,  
491 resulting in upregulation of a handful of heat shock proteins. Heat shock proteins are molecular  
492 chaperones that under normal conditions facilitate protein assembly and are upregulated in  
493 response to stressors (Akerfelt et al., 2010). Heat shock protein expression in gonads increases  
494 during spermatogenesis and oogenesis (Neuer et al., 2000) which may ensure that the  
495 development of gametes is shielded from environmental stressors. Importantly, some of the  
496 same genes (e.g. HSP90AA1, DNAJA4) upregulated in response to acute handling stress in this  
497 study, were also upregulated in chicken testes in response to heat stress (Wang et al., 2015),  
498 indicating that gonads may have a generalized cellular stress response that is upregulated in  
499 response to a variety of stressors. Analysis of transcriptomic changes in other tissues will  
500 indicate if the change in gonadal transcriptome represents testes-specific response to stress, or  
501 if response to stress between tissues differs.

502

### 503 **4.3. Interaction between chronic and acute stressors**

504 Birds from chronic disturbance and control treatments responded differently to the acute  
505 handling stressor: whereas handling reduced testosterone levels in control birds, it did not affect  
506 testosterone levels in birds from the chronic disturbance treatment. This difference can be  
507 interpreted in two non-exclusive ways.

508 First, the reduced impact of the acute stressor on testosterone in birds from the chronic  
509 disturbance group might have arisen because their reproductive function was already  
510 downregulated to a degree that prohibited further decrease (“floor effect” *sensu* (Sapolsky et al.,  
511 1984)). In our study, however, both the baseline and post-handling testosterone levels of  
512 chronically disturbed animals were significantly higher than testosterone levels at the beginning  
513 of the experiment. This suggests that, mechanistically, testosterone levels could have shown a  
514 further decrease below the levels observed in response to the acute handling stressor. It is  
515 possible, however, that the lack of decrease in testosterone in response to handling in  
516 chronically disturbed birds may be due to reduced testosterone metabolism by the liver. If this

517 was the case, we would predict that acute stressors would start suppressing testosterone levels  
518 later in chronically disturbed animals compared to control animals. Unfortunately, our  
519 experimental design did not allow us to test this possibility due to the GnRH injection during  
520 blood sampling.

521 Second, the difference in the effect of handling on testosterone levels between chronic  
522 disturbance and control treatments could be explained by a lower sensitivity of the chronically  
523 disturbed birds to stressors compared to the control individuals. We did not find any effect of  
524 chronic disturbance on gonadal signaling that would explain this difference, suggesting that  
525 differences in sensitivity to stress may exist in the HPG axis tissues that are upstream from the  
526 gonad (pituitary, hypothalamus), or other hormonal targets that interact with testosterone  
527 production.

528 From an ecological perspective, the first alternative (floor effect) could be interpreted as  
529 a consequence of homeostatic overload (Romero et al., 2009). Homeostatic overload refers to  
530 the cases where overexposure to stressors, and the associated increase in the frequency of  
531 stress response, results in a pathological state that leads to compromised organismal function  
532 (Romero et al., 2009). In our study, the high frequency of stressors may have resulted in a  
533 compromised ability to produce testosterone. However, because birds from both chronic and  
534 control treatments elevated their testosterone in response to GnRH to the same degree, this  
535 explanation seems unlikely. Instead, the floor effect could represent be a result of a “best of a  
536 bad job” strategy, wherein individuals of low quality or in a bad environment maximize their  
537 fitness by playing it safe (Sih and Bell, 2008). In this case, animals may opt to keep the  
538 resources diverted from reproduction to maximize their ability to respond to stressors. This  
539 strategy would be more likely to be adaptive in long-lived animals and in environments where the  
540 disturbance frequency is likely to change. However, even in short-lived animals, strategies with  
541 low investment in reproduction can have higher fitness compared to cases when animals invest  
542 in reproduction at the cost of survival (e.g. sneaky copulations by alternative morphs in beetles  
543 (Moczek and Emlen, 2000)).

544 The second alternative (differences in sensitivity to stress), is consistent with the life  
545 history prediction that under conditions of low expected future reproductive success, stress  
546 should have a less negative effect on reproduction compared to situations where expected  
547 reproductive success is high (Wingfield and Sapolsky, 2003). Animals that develop in  
548 environments with high frequency of stressors may change their physiology to reduce sensitivity  
549 of HPG axis to stress, thus allowing them to maintain reproductive function during stressful  
550 episodes, despite the possible cost to self-maintenance (Wingfield and Sapolsky, 2003). This

551 prediction has been supported by a study in a natural system (Abolins-Abols et al., 2016), where  
552 the reproductive phenotype of urban animals is less sensitive to stressors compared to rural  
553 animals.

554 In contrast to our testosterone findings, we did not find an interaction between  
555 chronic and acute treatments on the gonadal transcriptome, although we note that the marginal  
556 effects of the chronic treatment reduce our power to explore this interaction. This finding  
557 nevertheless provides further evidence that chronic disturbance does not affect gonadal  
558 capacity to produce testosterone or respond to stress. Instead, we hypothesize that the  
559 differential effect of handling stress on testosterone levels in the chronic disturbance and control  
560 treatments may be due to differences in upstream signaling from the pituitary or hypothalamus,  
561 which regulates the activity of the molecular machinery in the gonad. Further work will be  
562 needed to explore alternatives, such as post-translational effects of stress that are not captured  
563 at the level of gene expression, or temporal dynamics wherein acute and chronic stressors  
564 interact at only specific time-points following a stressor. Despite these uncertainties, our results  
565 nevertheless demonstrate that the gonad is relatively robust to interacting effects of acute and  
566 chronic stressors on gene expression.

567

#### 568 **4.4. Summary**

569 Overall our results show that chronic and acute stressors suppress testosterone release by the  
570 gonads, but that the effect of acute stressors differs depending on the frequency of stressors in  
571 the environment. These differences in gonadal function between disturbance environments are  
572 unlikely to be mediated by changes in gonadal gene expression, but are more likely to reside  
573 upstream of the gonad. Whereas chronic treatment had a negligible effect on the gonadal  
574 transcriptome, acute handling stress significantly upregulated major components of cellular  
575 stress response and affected the expression of hormone receptors involved in downregulation  
576 of testosterone production. These results suggest a potential mechanism for regulating  
577 testosterone decrease in response to acute stressors. Furthermore, they show that transient  
578 changes in gene expression in response to acute stressors are different from more permanent  
579 responses to chronic stressors. An important future direction therefore is to identify the  
580 mechanisms responsible for differences in testosterone levels between animals experiencing  
581 different disturbance regimes.

582 This study is among the first to experimentally test the mechanisms by which acute and  
583 chronic stressors interact to influence reproduction. We demonstrate patterns that, adaptive or  
584 not, are doubtlessly important in understanding how animals respond to chronic and acute

585 stressors. We therefore urge further study on the adaptive significance and mechanisms that  
586 mediate the effect of chronic stressors on testosterone levels and other reproductive functions.

587

### 588 **Acknowledgments**

589 This study was conducted in accordance with Indiana University Animal Care and Use  
590 Committee guidelines, protocol #12-050-08. We thank A. Kimmitt, S. Slowinski, H. Kassab, A.  
591 Brenner, A. McKay, C. Taylor, and N. Fletcher for assistance with disturbance manipulations,  
592 animal care, and sampling. We thank L. Sloan, who extracted RNA, M. Stephens, who ran the  
593 microarray at the University of Notre Dame Genomics & Bioinformatics Core Facility, and D.  
594 Rusch and A. Fellows from IU's Center for Genomics and Bioinformatics for assistance with  
595 microarray data analysis. We thank C. Bergeon-Burns for providing us with primer sequences  
596 and advice on lab work, R.A. Stewart for assistance with molecular sex determination, and the  
597 Center for the Integrative Study of Animal Behavior at IU for providing laboratory facilities and  
598 equipment.

599

### 600 **Competing interests**

601 Authors have no competing interests to declare.

602

### 603 **Funding**

604 This study was funded by the National Institutes of Health grant R21HD073583 to KAR and the  
605 National Science Foundation grant IOS-1257474 to EDK.

606

### 607 **Data availability**

608 Data will be published in the Dryad Digital Repository upon acceptance.

609

### 610 **References**

- 611 **Abolins-Abols, M., Hope, S. F. and Ketterson, E. D.** (2016). Effect of acute stressor on  
612 reproductive behavior differs between urban and rural birds. *Ecol. Evol.* **6**, 6546–6555.
- 613 **Akerfelt, M., Morimoto, R. I. and Sistonen, L.** (2010). Heat shock factors: integrators of cell  
614 stress, development and lifespan. *Nat. Rev. Mol. Cell Biol.* **11**, 545–55.
- 615 **Alexa, A. and Rahnenfuhrer, J.** (2010). *topGO: enrichment analysis for gene ontology*. R  
616 package version 2.8.0. Available at <http://cran.r-project.org>.
- 617 **Alexa, A., Rahnenführer, J. and Lengauer, T.** (2006). Improved scoring of functional groups  
618 from gene expression data by decorrelating GO graph structure. *Bioinformatics* **22**, 1600–

- 619 1607.
- 620 **Armario, A. and Castellanos, J. M.** (1984). Effect of acute and chronic stress on testosterone  
621 secretion in male rats. *J. Endocrinol. Invest.* **7**, 659–661.
- 622 **Ashburner, M., Ball, C. A., Blake, J. A., Botstein, D., Butler, H., Cherry, J. M., Davis, A. P.,**  
623 **Dolinski, K., Dwight, S. S., Eppig, J. T., et al.** (2000). Gene Ontology: tool for the  
624 unification of biology. *Nat. Genet.* **25**, 25–29.
- 625 **Atwell, J. W., Cardoso, G. C., Whittaker, D. J., Price, T. D. and Ketterson, E. D.** (2014).  
626 Hormonal, behavioral, and life-history traits exhibit correlated shifts in relation to population  
627 establishment in a novel environment. *Am. Nat.* **184**, E147-160.
- 628 **Bergeon Burns, C. M., Rosvall, K. a, Hahn, T. P., Demas, G. E. and Ketterson, E. D.** (2014).  
629 Examining sources of variation in HPG axis function among individuals and populations of  
630 the dark-eyed junco. *Horm. Behav.* **65**, 179–187.
- 631 **Birkhead, T. R., Briskie, J. V. and Møller, A. P.** (1993). Male sperm reserves and copulation  
632 frequency in birds. *Behav. Ecol. Sociobiol.* **32**, 85–93.
- 633 **Breen, K. M. and Karsch, F. J.** (2006). New insights regarding glucocorticoids, stress and  
634 gonadotropin suppression. *Front Neuroendocr.* **27**, 233–245.
- 635 **Breen, K. M., Oakley, A. E., Pytiak, A. V, Tilbrook, A. J., Wagenmaker, E. R. and Karsch, F.**  
636 **J.** (2007). Does cortisol acting via the type II glucocorticoid receptor mediate suppression  
637 of pulsatile luteinizing hormone secretion in response to psychosocial stress?  
638 *Endocrinology* **148**, 1882–1890.
- 639 **Breuner, C. W., Patterson, S. H. and Hahn, T. P.** (2008). In search of relationships between  
640 **the acute adrenocortical response and fitness.** *Gen. Comp. Endocrinol.* **157**, 288–95.
- 641 **Calisi, R., Austin, S., Lang, A. S. and MacManes, M. D.** (2017). Sex-biased transcriptomic  
642 response of the reproductive axis to stress. bioRxiv  
643 152801; doi: <https://doi.org/10.1101/152801>
- 644 **Chand, D. and Lovejoy, D. a.** (2011). Stress and reproduction: Controversies and challenges.  
645 *Gen. Comp. Endocrinol.* **171**, 253–257.
- 646 **Ciechanowska, M., Lapot, M., Mateusiak, K. and Przekop, F.** (2010). Neuroendocrine  
647 regulation of GnRH release and expression of GnRH and GnRH receptor genes in the  
648 hypothalamus-pituitary unit in different physiological states. *Reprod. Biol.* **10**, 85–124.
- 649 **Clotfelter, E. D., O’Neal, D. M., Gaudioso, J. M., Casto, J. M., Parker-Renga, I. M., Snajdr,**  
650 **E. A., Duffy, D. L., Nolan, V. and Ketterson, E. D.** (2004). Consequences of elevating  
651 plasma testosterone in females of a socially monogamous songbird: Evidence of  
652 constraints on male evolution? *Horm. Behav.* **46**, 171–178.

- 653 **Dahlöf, L.-G., Hård, E. and Larsson, K.** (1978). Influence of maternal stress on the  
654 development of the fetal genital system. *Physiol. Behav.* **20**, 193–195.
- 655 **Deviche, P. J., Hurley, L. L., Fokidis, H. B., Lebour, B., Silverin, B., Silverin, B., Sabo, J.**  
656 **and Sharp, P. J.** (2010). Acute stress rapidly decreases plasma testosterone in a free-  
657 ranging male songbird: potential site of action and mechanism. *Gen. Comp. Endocrinol.*  
658 **169**, 82–90.
- 659 **Deviche, P., Gao, S., Davies, S., Sharp, P. J. and Dawson, A.** (2012). Rapid stress-induced  
660 inhibition of plasma testosterone in free-ranging male rufous-winged sparrows, *Peucaea*  
661 *carpalis*: characterization, time course, and recovery. *Gen. Comp. Endocrinol.* **177**, 1–8.
- 662 **Dickens, M., Romero, L. M., Cyr, N. E., Dunn, I. C. and Meddle, S. L.** (2009). Chronic stress  
663 alters glucocorticoid receptor and mineralocorticoid receptor mRNA expression in the  
664 European starling (*Sturnus vulgaris*) brain. *J. Neuroendocrinol.* **21**, 832–40.
- 665 **Ernst, D. K., Lynn, S. E. and Bentley, G. E.** (2015). Differential response of GnIH in the brain  
666 and gonads following acute stress in a songbird. *Gen. Comp. Endocrinol.*
- 667 **Farner, D. S. and Wingfield, J. C.** (1980). Reproductive endocrinology of birds. *Annu. Rev.*  
668 *Physiol.* **42**, 457–472.
- 669 **Fusani, L., Donaldson, Z., London, S. E., Fuxjager, M. J. and Schlinger, B. A.** (2014).  
670 Expression of androgen receptor in the brain of a sub-oscine bird with an elaborate  
671 courtship display. *Neurosci. Lett.* **578**, 61–65.
- 672 **Griffiths, R., Double, M. C., Orr, K. and Dawson, R. J.** (1998). A DNA test to sex most birds.  
673 *Mol. Ecol.* **7**, 1071–1075.
- 674 **Guillette Jr, L. J., Gross, T. S., Masson, G. R., Matter, J. M., Percival, H. F. and Woodward,**  
675 **A. R.** (1994). Developmental abnormalities of the gonad and abnormal sex hormone  
676 concentrations in juvenile alligators from contaminated and control lakes in Florida.  
677 *Environ. Health Perspect.* **102**, 680.
- 678 **Hansen, P. J.** (2009). Effects of heat stress on mammalian reproduction. *Philos. Trans. R. Soc.*  
679 *Lond. B. Biol. Sci.* **364**, 3341–50.
- 680 **Hau, M.** (2007). Regulation of male traits by testosterone: implications for the evolution of  
681 vertebrate life histories. *BioEssays* **29**, 133–q44.
- 682 **Hutchinson, J.** (1967). Initiation of courtship by hypothalamic implants of testosterone  
683 propionate in castrated doves (*Streptopelia risoria*). *Nature* **216**, 591–592.
- 684 **Jawor, J. M., McGlothlin, J. W., Casto, J. M., Greives, T. J., Snajdr, E. A., Bentley, G. E.**  
685 **and Ketterson, E. D.** (2006). Seasonal and individual variation in response to GnRH  
686 challenge in male dark-eyed juncos (*Junco hyemalis*). *Gen. Comp. Endocrinol.* **149**, 182–



- 687 189.
- 688 **Jones, S. M. and Bell, K.** (2004). Plasma corticosterone concentrations in males of the skink  
689 *Egernia whitii* during acute and chronic confinement, and over a diel period. *Comp.*  
690 *Biochem. Physiol. - A Mol. Integr. Physiol.* **137**, 105–113.
- 691 **Kerley, L. L., Goodrich, J. M., Miquelle, D. G., Smirnov, E. N., Quigley, H. B. and**  
692 **Hornocker, M. G.** (2002). Effects of roads and human disturbance on Amur tigers.  
693 *Conserv. Biol.* **16**, 97–108.
- 694 **London, S. E., Monks, D. A., Wade, J. and Schlinger, B. A.** (2006). Widespread capacity for  
695 steroid synthesis in the avian brain and song system. *Endocrinology* **147**, 5975–5987.
- 696 **Lynn, S. E., Perfito, N., Guardado, D. and Bentley, G. E.** (2015). Food, stress, and circulating  
697 testosterone: Cue integration by the testes, not the brain, in male zebra finches  
698 (*Taeniopygia guttata*). *Gen. Comp. Endocrinol.* **215**, 1–9.
- 699 **Maney, D. L. and Goodson, J. L.** (2011). Neurogenomic mechanisms of aggression in  
700 songbirds. *Adv. Genet.* **75**, 83–119.
- 701 **McGlothlin, J. W., Whittaker, D. J., Schrock, S. E., Gerlach, N. M., Jawor, J. M., Snajdr, E.**  
702 **A. and Ketterson, E. D.** (2010). Natural selection on testosterone production in a wild  
703 songbird population. *Am. Nat.* **175**, 687–701.
- 704 **McGrady, A. V** (1984). Effects of psychological stress on male reproduction: a review. *Arch.*  
705 *Androl.* **13**, 1–7.
- 706 **McGuire, N. L. and Bentley, G. E.** (2010). A functional neuropeptide system in vertebrate  
707 gonads: Gonadotropin-inhibitory hormone and its receptor in testes of field-caught house  
708 sparrow (*Passer domesticus*). *Gen. Comp. Endocrinol.* **166**, 565–572.
- 709 **McGuire, N. L., Koh, A. and Bentley, G. E.** (2013). The direct response of the gonads to cues  
710 of stress in a temperate songbird species is season-dependent. *PeerJ* **1**, e139.
- 711 **McMillen, I. C. and Robinson, J. S.** (2005). Developmental origins of the metabolic syndrome:  
712 prediction, plasticity, and programming. *Physiol. Rev.* **85**, 571–633.
- 713 **Moczek, A. and Emlen, D.** (2000). Male horn dimorphism in the scarab beetle, *Onthophagus*  
714 *taurus*: do alternative reproductive tactics favour alternative phenotypes? *Anim. Behav.* **59**,  
715 459–466.
- 716 **Moore, I. T. and Mason, R. T.** (2000). Behavioral and hormonal responses to corticosterone in  
717 the male red-sided garter snake, *Thamnophis sirtalis parietalis*. *Physiol. Behav.* **59**, 529–  
718 534.
- 719 **Moore, M. C., Thompson, C. W. and Marler, C. a.** (1991). Reciprocal changes in  
720 corticosterone and testosterone levels following acute and chronic handling stress in the

- 721 tree lizard, *Urosaurus ornatus*. *Gen. Comp. Endocrinol.* **81**, 217–226.
- 722 **Nargund, V. H.** (2015). Effects of psychological stress on male fertility. *Nat. Rev. Urol.* **12**, 373–  
723 382.
- 724 **Nelson, R. J., Frank, D., Bennett, S. A. and Carter, C. S.** (1989). Simulated drought  
725 influences reproduction in male prairie voles. *Physiol. Behav.* **46**, 849–852.
- 726 **Neuer, A., Spandorfer, S. D., Giraldo, P., Dieterle, S., Rosenwaks, Z. and Witkin, S. S.**  
727 (2000). The role of heat shock proteins in reproduction. *Hum. Reprod. Update* **6**, 149–59.
- 728 **Nikolarakis, K. E., Almeida, O. F. and Herz, a** (1986). Corticotropin-releasing factor (CRF)  
729 inhibits gonadotropin-releasing hormone (GnRH) release from superfused rat hypothalami  
730 in vitro. *Brain Res.* **377**, 388–90.
- 731 **Nogueiras, R., Barreiro, M. L., Caminos, J. E., Gaytán, F., Suominen, J. S., Navarro, V. M.,  
732 Casanueva, F. F., Aguilar, E., Toppari, J., Diéguez, C., et al.** (2004). Novel expression of  
733 resistin in rat testis: functional role and regulation by nutritional status and hormonal  
734 factors. *J. Cell Sci.* **117**, 3247–3257.
- 735 **Page, K. C., Sottas, C. M. and Hardy, M. P.** (2001). Prenatal exposure to dexamethasone  
736 alters Leydig cell steroidogenic capacity in immature and adult rats. *J. Androl.* **22**, 973–80.
- 737 **Peterson, M. P., Whittaker, D. J., Ambreth, S., Sureshchandra, S., Buechlein, A.,  
738 Podicheti, R., Choi, J.-H., Lai, Z., Mockatis, K., Colbourne, J., et al.** (2012). De novo  
739 transcriptome sequencing in a songbird, the dark-eyed junco (*Junco hyemalis*): genomic  
740 tools for an ecological model system. *BMC Genomics* **13**, 305.
- 741 **Peterson, M. P., Rosvall, K. A., Taylor, C. A., Lopez, J. A., Choi, J.-H., Ziegenfus, C., Tang,  
742 H., Colbourne, J. K. and Ketterson, E. D.** (2014). Potential for sexual conflict assessed  
743 via testosterone-mediated transcriptional changes in liver and muscle of a songbird. *J. Exp.*  
744 *Biol.* **217**, 507–517.
- 745 **Pickering, a D., Pottinger, T. G., Carragher, J. and Sumpter, J. P.** (1987). The effects of  
746 acute and chronic stress on the levels of reproductive hormones in the plasma of mature  
747 male brown trout, *Salmo trutta* L. *Gen. Comp. Endocrinol.* **68**, 249–59.
- 748 **Pinheiro, J., Bates, D., DebRoy, S., Sarkar, D. and R Core Team** (2015). *nlme: Linear and*  
749 *Nonlinear Mixed Effects Models*. R package version 3.1-109. Available at [http://cran.r-](http://cran.r-project.org/package=nlme)  
750 [project.org/package=nlme](http://cran.r-project.org/package=nlme).
- 751 **R Core Team** (2013). *R: A language and environment for statistical computing*. R Foundation  
752 for Statistical Computing. Vienna, Austria. Available at <http://www.r-project.org>.
- 753 **Ray Salt, W.** (1954). The structure of the cloacal protuberance of the Vesper sparrow  
754 (*Poecetes gramineus*) and certain other passerine birds. *1The Auk* **71**, 64–73.



- 755 **Retana-Márquez, S., Bonilla-Jaime, H., Vázquez-Palacios, G., Martínez-García, R. and**  
756 **Velázquez-Moctezuma, J.** (2003). Changes in masculine sexual behavior, corticosterone  
757 and testosterone in response to acute and chronic stress in male rats. *Horm. Behav.* **44**,  
758 327–337.
- 759 **Reul, J. M. H. M. and Kloet, E. R. de** (1985). Two receptor systems for corticosterone in rat  
760 brain: microdistribution and differential occupation. *Endocrinology* **117**, 2505–2511.
- 761 **Rhind, S. M., Rae, M. T. and Nigel Brooks, A.** (2001). Effects of nutrition and environmental  
762 factors on the fetal programming of the reproductive axis. *Reproduction* **122**, 205–214.
- 763 **Rivier, C. and Rivest, S.** (1991). Effect of stress on the activity of the hypothalamic-pituitary-  
764 gonadal axis: peripheral and central mechanisms. *Biol. Reprod.* **45**, 523–532.
- 765 **Romero, L. M., Dickens, M. J. and Cyr, N. E.** (2009). The Reactive Scope Model - a new  
766 model integrating homeostasis, allostasis, and stress. *Horm. Behav.* **55**, 375–89.
- 767 **Rosvall, K. A., Burns, C. M. B., Jayaratna, S. P., Dossey, E. K. and Ketterson, E. D.**  
768 (2016a). Gonads and the evolution of hormonal phenotypes. *Integr. Comp. Biol.* **56**, 225–  
769 234.
- 770 **Rosvall, K. A., Bergeon Burns, C. M., Jayaratna, S. P. and Ketterson, E. D.** (2016b).  
771 Divergence along the gonadal steroidogenic pathway: Implications for hormone-mediated  
772 phenotypic evolution. *Horm. Behav.* **84**, 1–8.
- 773 **Sapolsky, R. M., Krey, L. C. and McEwen, B. S.** (1984). Stress down-regulates corticosterone  
774 receptors in a site-specific manner in the brain. *Endocrinology* **114**, 287–292.
- 775 **Selye, H.** (1946). The general adaptation syndrome and the diseases of adaptation. *J. Clin.*  
776 *Endocrinol. Metab.* **6**, 117–230.
- 777 **Sheriff, M. J., Krebs, C. J. and Boonstra, R.** (2010). The ghosts of predators past: population  
778 cycles and the role of maternal programming under fluctuating predation risk. *Ecology* **91**,  
779 2983–94.
- 780 **Sheriff, M. J., Dantzer, B., Delehanty, B., Palme, R. and Boonstra, R.** (2011). Measuring  
781 stress in wildlife: Techniques for quantifying glucocorticoids. *Oecologia* **166**, 869–887.
- 782 **Sih, A. and Bell, A.** (2008). Insights for behavioral ecology from behavioral syndromes. *Adv.*  
783 *Study Behav.* **38**, 227–281.
- 784 **Sih, A., Ferrari, M. C. O. and Harris, D. J.** (2011). Evolution and behavioural responses to  
785 human-induced rapid environmental change. *Evol. Appl.* **4**, 367–387.
- 786 **Smith, J. T. and Waddell, B. J.** (2000). Increased fetal glucocorticoid exposure delays puberty  
787 onset in postnatal life. *Endocrinology* **141**, 2422–2428.
- 788 **Smyth, G. K.** (2005). Limma: linear models for microarray data. In *Bioinformatics and*

- 789 *Computational Biology Solution Using R and Bioconductor*, pp. 397–420. New York:  
790 Springer.
- 791 **Soma, K. K.** (2006). Testosterone and aggression: Berthold, birds and beyond. *J.*  
792 *Neuroendocrinol.* **18**, 543–51.
- 793 **Tena-Sempere, M., Barreiro, M. L., González, L. C., Gaytán, F., Zhang, F. P., Caminos, J.**  
794 **E., Pinilla, L., Casanueva, F. F., Diéguez, C. and Aguilar, E.** (2002). Novel expression  
795 and functional role of ghrelin in rat testis. *Endocrinology* **143**, 717–725.
- 796 **Tsutsui, K., Bentley, G. E., Bedecarrats, G., Osugi, T., Ubuka, T. and Kriegsfeld, L. J.**  
797 (2010). Gonadotropin-inhibitory hormone (GnIH) and its control of central and peripheral  
798 reproductive function. *Front. Neuroendocrinol.* **31**, 284–295.
- 799 **Tuttle, E. M., Pruett-Jones, S. and Webster, M. S.** (1996). Cloacal Protuberances and  
800 Extreme Sperm Production in Australian Fairy-Wrens. *Proc. R. Soc. B Biol. Sci.* **263**, 1359–  
801 1364.
- 802 **Ulrich-Lai, Y. M. and Herman, J. P.** (2009). Neural regulation of endocrine and autonomic  
803 stress responses. *Nat. Rev. Neurosci.* **10**, 397–409.
- 804 **Wang, S. H., Cheng, C. Y., Tang, P. C., Chen, C. F., Chen, H. H., Lee, Y. P. and Huang, S. Y.**  
805 (2015). Acute heat stress induces differential gene expressions in the testes of a broiler-  
806 type strain of Taiwan country chickens. *PLoS One* **10**, 1–14.
- 807 **Wingfield, J. C.** (2012). Regulatory mechanisms that underlie phenology, behavior, and coping  
808 with environmental perturbations: An alternative look at biodiversity. *Auk* **129**, 1–7.
- 809 **Wingfield, J. C. and Sapolsky, R. M.** (2003). Reproduction and resistance to stress: when and  
810 how. *J. Neuroendocrinol.* **15**, 711–24.
- 811 **Wingfield, J. C., Ball, G. F., Dufty Jr., A. M., Hegner, R. E. and Ramenofsky, M.** (1987).  
812 Testosterone and Aggression in Birds. *Am. Sci.* **75**, 602–608.
- 813 **Witschi, E.** (1961). Sex and secondary sexual characters. In *Biology and comparative*  
814 *physiology of birds* (ed. Marshall, A. J.), pp. 115–168. New York: Academic Press.
- 815 **Ye, J., Coulouris, G., Zaretskaya, I., Cutcutache, I., Rozen, S. and Madden, T. L.** (2012).  
816 Primer-BLAST: a tool to design target-specific primers for polymerase chain reaction. *BMC*  
817 *Bioinformatics* **13**, 134.
- 818 **Zambrano, E., Guzmán, C., Rodríguez-González, G. L., Durand-Carbajal, M. and**  
819 **Nathanielsz, P. W.** (2014). Fetal programming of sexual development and reproductive  
820 function. *Mol. Cell. Endocrinol.* **382**, 538–549.
- 821 **Zinzow-Kramer, W. M., Horton, B. M. and Maney, D. L.** (2014). Evaluation of reference genes  
822 for quantitative real-time PCR in the brain, pituitary, and gonads of songbirds. *Horm.*

823        *Behav.* **66**, 267–275.

824

825 **Table 1:** Gene ontology (GO) processes significantly affected by the acute handling treatment  
 826 (H) compared to unhandled control treatment (U) . Type= GO category; BP = biological process,  
 827 MF = molecular function; N = number of genes per GO category in microarray; DE = number of  
 828 genes per GO category significantly differentially expressed between treatments. Non-  
 829 underlined genes were up-regulated in the H treatment. Underlined genes were up-regulated in  
 830 C treatment. Group bias refers to direction of upregulation.

| Gene ontology description                                                             | GO #       | Type | N    | DE | p value | Group bias | Genes                                                                                                                                                            |
|---------------------------------------------------------------------------------------|------------|------|------|----|---------|------------|------------------------------------------------------------------------------------------------------------------------------------------------------------------|
| regulation of sodium ion transport                                                    | GO:0002028 | BP   | 8    | 1  | 0.036   | H          | NEDD4                                                                                                                                                            |
| endothelium development                                                               | GO:0003158 | BP   | 8    | 1  | 0.036   | H          | S1PR1                                                                                                                                                            |
| mitochondrial membrane organization                                                   | GO:0007006 | BP   | 7    | 1  | 0.032   | H          | HSP90AA1                                                                                                                                                         |
| regulation of lamellipodium assembly                                                  | GO:0010591 | BP   | 7    | 1  | 0.032   | H          | HSP90AA1                                                                                                                                                         |
| phosphatidylinositol 3-kinase signaling                                               | GO:0014065 | BP   | 11   | 1  | 0.050   | H          | NEDD4                                                                                                                                                            |
| negative regulation of blood coagulation                                              | GO:0030195 | BP   | 7    | 1  | 0.032   | H          | TMPRSS6                                                                                                                                                          |
| intracellular steroid hormone receptor signaling pathway                              | GO:0030518 | BP   | 51   | 3  | 0.002   | H          | DNAJA4, FKBP4, NEDD4                                                                                                                                             |
| TOR signaling                                                                         | GO:0031929 | BP   | 10   | 1  | 0.045   | H          | SLC7A1                                                                                                                                                           |
| negative regulation of actin filament bundle assembly                                 | GO:0032232 | BP   | 5    | 1  | 0.023   | H          | S1PR1                                                                                                                                                            |
| cellular protein complex assembly                                                     | GO:0043623 | BP   | 69   | 2  | 0.040   | H          | HSP90AA1, FKBP4                                                                                                                                                  |
| response to stimulus                                                                  | GO:0050896 | BP   | 2099 | 20 | 0.007   | H          | TMPRSS6, HSP90AA1, SERPINH1, HSPB1, HSPH1, <u>CUBN</u> , DNAJB5, HSP90B1, DNAJA4, S1PR1, SLC7A1, HSPA4L, PIK3AP1, ERN1, FKBP4, <u>PTGR1</u> , <u>EPX</u> , NEDD4 |
| 'de novo' posttranslational protein folding                                           | GO:0051084 | BP   | 9    | 1  | 0.041   | H          | HSPH1                                                                                                                                                            |
| vitamin transport                                                                     | GO:0051180 | BP   | 5    | 1  | 0.023   | U          | <u>CUBN</u>                                                                                                                                                      |
| endoribonuclease activity                                                             | GO:0004521 | MF   | 9    | 1  | 0.040   | H          | ERN1                                                                                                                                                             |
| receptor signaling protein activity                                                   | GO:0005057 | MF   | 30   | 2  | 0.008   | H          | PIK3AP1, MAP3K8                                                                                                                                                  |
| amine transmembrane transporter activity                                              | GO:0005275 | MF   | 10   | 1  | 0.045   | H          | SLC7A1                                                                                                                                                           |
| macrolide binding                                                                     | GO:0005527 | MF   | 5    | 1  | 0.023   | H          | FKBP4                                                                                                                                                            |
| ion channel inhibitor activity                                                        | GO:0008200 | MF   | 7    | 1  | 0.032   | H          | NEDD4                                                                                                                                                            |
| L-amino acid transmembrane transporter activity                                       | GO:0015179 | MF   | 6    | 1  | 0.027   | H          | SLC7A1                                                                                                                                                           |
| oxidoreductase activity, acting on the CH-CH group of donors, NAD or NADP as acceptor | GO:0016628 | MF   | 7    | 1  | 0.032   | U          | <u>PTGR1</u>                                                                                                                                                     |
| intramolecular oxidoreductase activity, interconverting keto- and enol-groups         | GO:0016862 | MF   | 7    | 1  | 0.032   | H          | PDIA4                                                                                                                                                            |
| adenyl ribonucleotide binding                                                         | GO:0032559 | MF   | 922  | 9  | 0.019   | H          | HSP90AA1, HSPH1, CLK4, HSP90B1, DNAJA4, HSPA4L, MAP3K8, ERN1, FKBP4                                                                                              |
| protein phosphorylated amino acid binding                                             | GO:0045309 | MF   | 8    | 1  | 0.036   | H          | NEDD4                                                                                                                                                            |
| lipoprotein particle receptor binding                                                 | GO:0070325 | MF   | 9    | 2  | 0.001   | H          | HSP90B1, DNAJA4                                                                                                                                                  |

831

832

833 **Table 2:** Gene ontology processes significantly affected by chronic disturbance vs control  
834 treatments. N = number of genes per GO category in microarray; DE = number of genes per GO  
835 category significantly differentially expressed between treatments. C = control treatment.  
836

| Gene ontology description            | GO #       | Type | N  | DE | p value | Group bias | Genes  |
|--------------------------------------|------------|------|----|----|---------|------------|--------|
| electron transport chain             | GO:0022900 | BP   | 37 | 1  | 0.023   | C          | NDUFA3 |
| extracellular structure organization | GO:0043062 | BP   | 81 | 1  | 0.049   | C          | POSTN  |
| glycosaminoglycan binding            | GO:0005539 | MF   | 48 | 1  | 0.027   | C          | POSTN  |

837 **Figure 1: Timeline of the experiment**

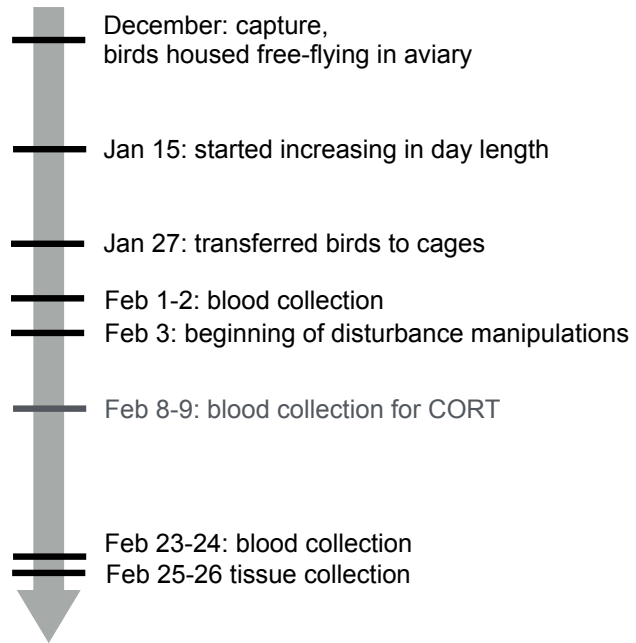

838

839

840 **Figure 2.** Effect of chronic disturbance and acute stressor on testosterone levels. A)  
841 testosterone levels before the experiment; B) testosterone levels after after the  
842 experiment. Shown are baseline testosterone levels, post-handling levels, and GnRH-  
843 induced testosterone levels. GnRH-induced testosterone was not measured before the  
844 experiment.  
845

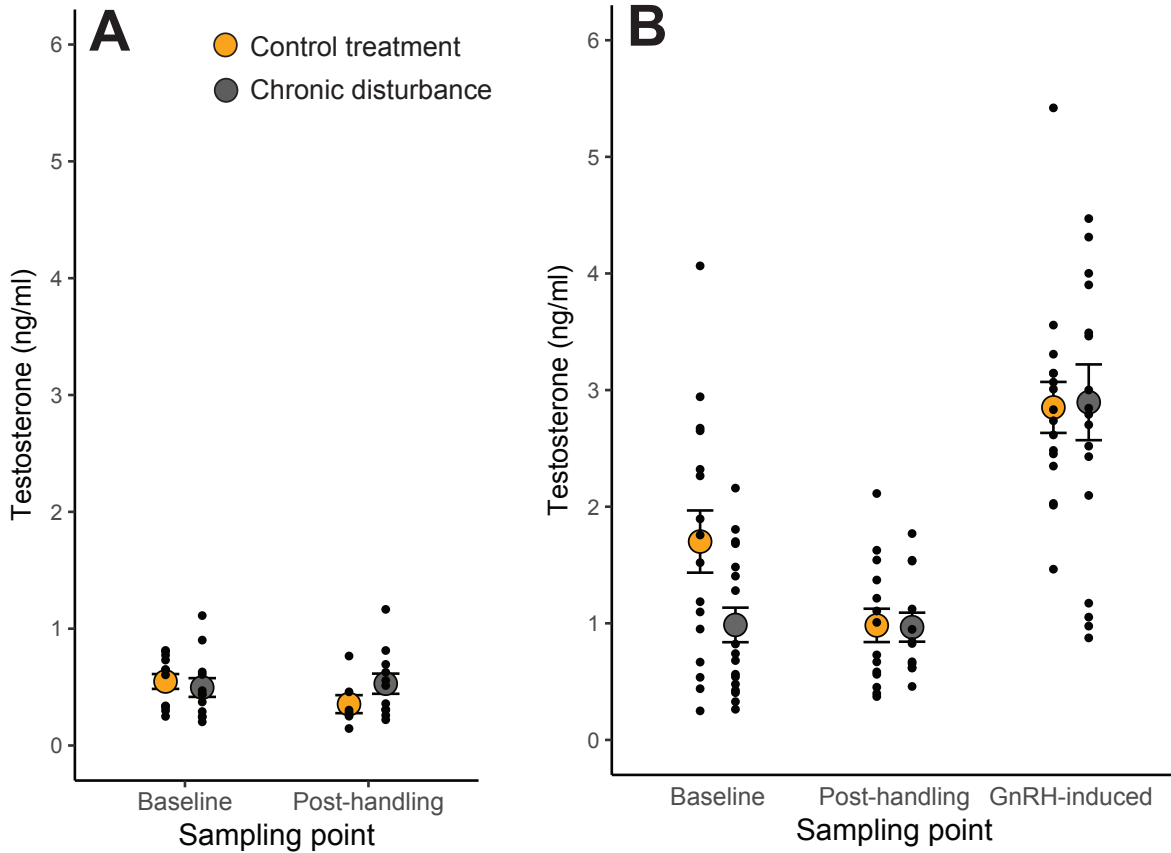

846

847

848

849 **Figure 3:** Effect of chronic disturbance on reproductive organs. A) Gonad mass; B)

850 Cloacal protuberance (CP). Points are jittered in B to show sample size.

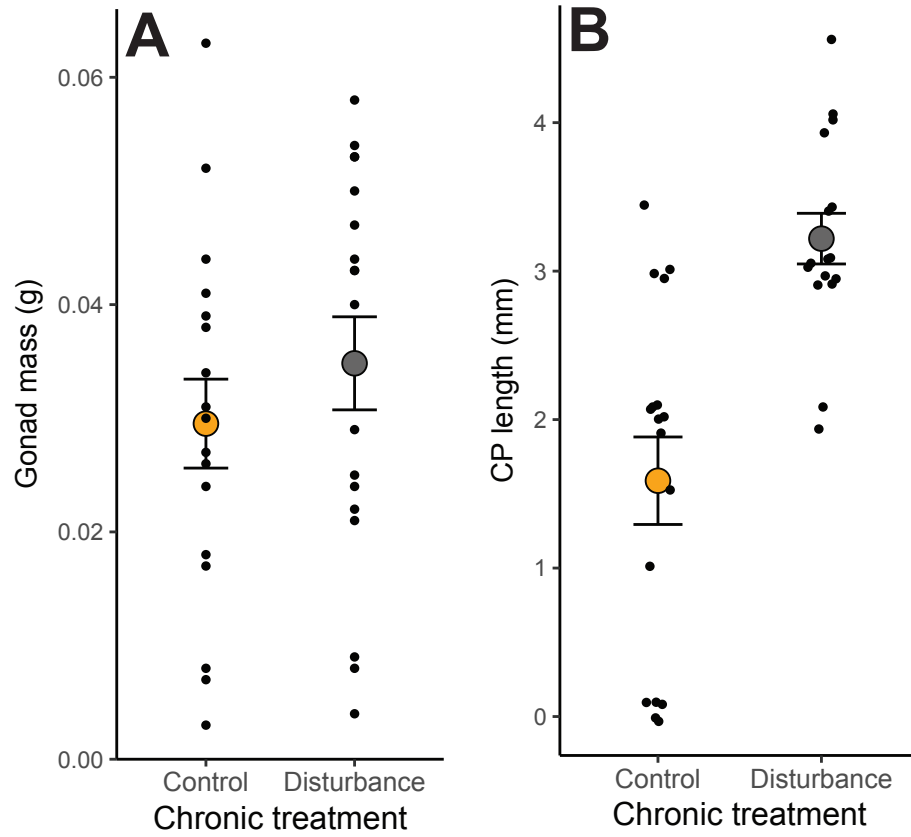

851

852



853 **Figure 4.** Effect of chronic disturbance and acute handling stressor on A) glucocorticoid  
854 receptor (GR) expression; B) mineralocorticoid receptor (MR) expression; C)  
855 gonadotropin inhibitory hormone receptor (GnIHR) expression in gonads.

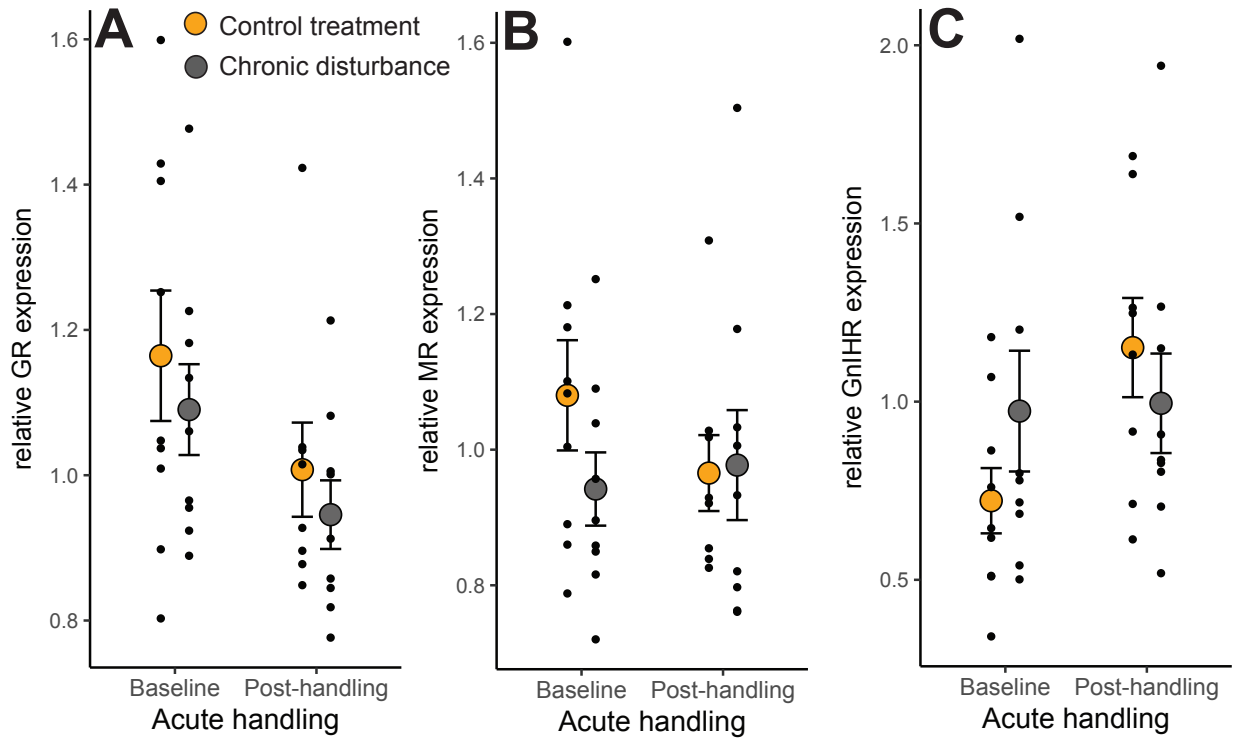

856
